# Supplementary material for: Plasma Exosome Proteins ILK1 and CD14 Correlated with Organ-Specific Metastasis in Advanced Gastric Cancer Patients
Source: MDPI journal article supplement (doi:10.3390/cancers15153986), 2023-08-05
Supplement: s1 [file s1]

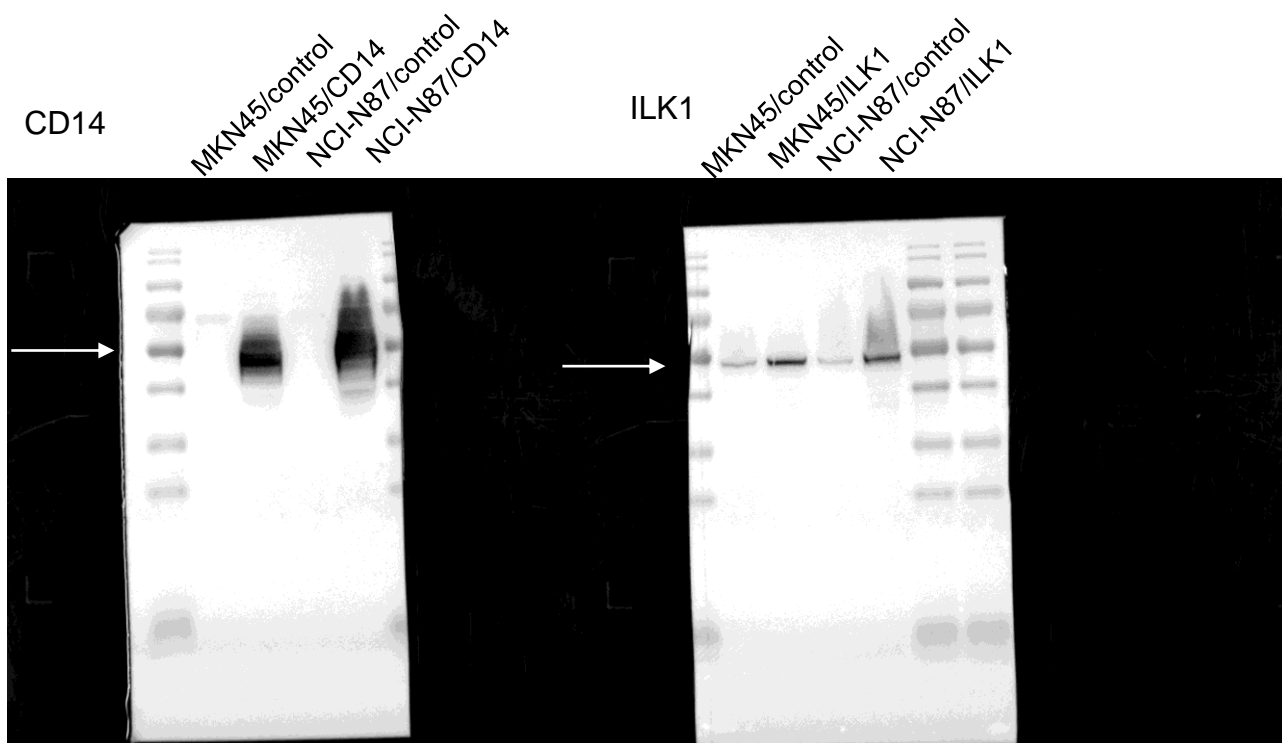

Figure 4A

Figure 4A

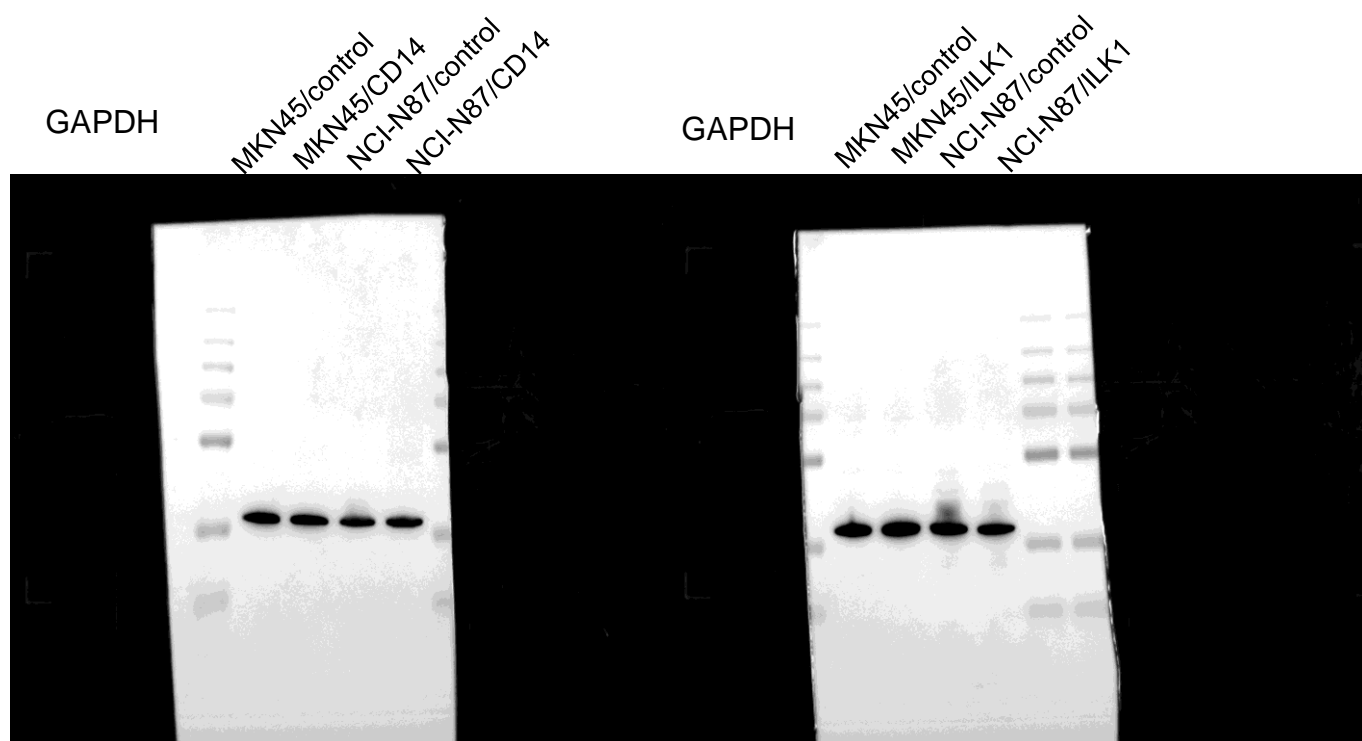

Figure 4A

Figure 4A

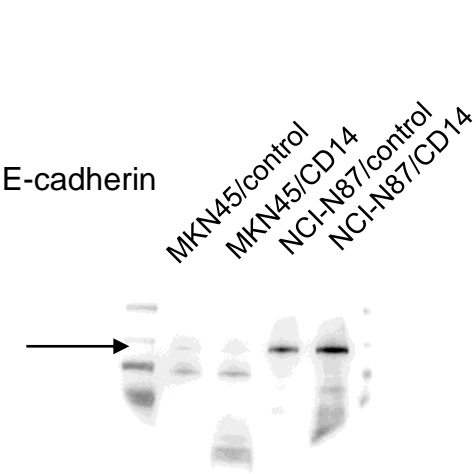

Figure 4E

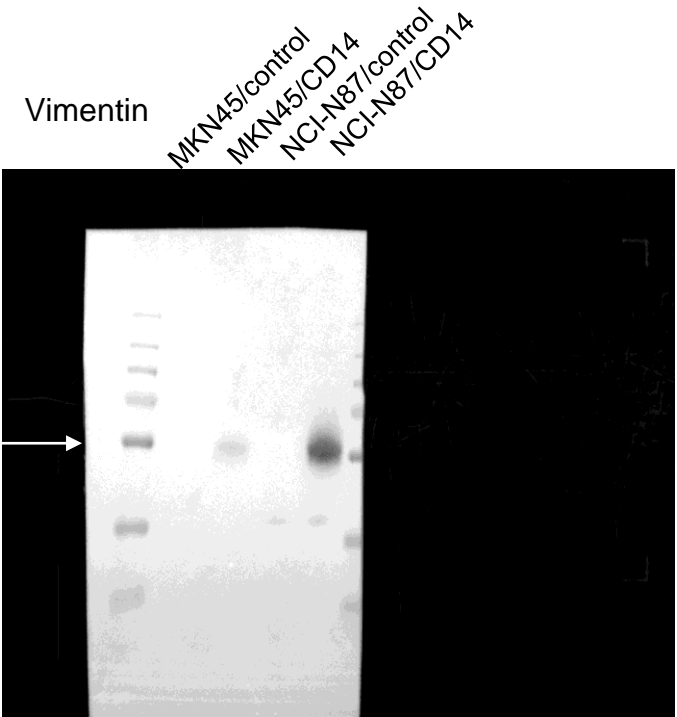

Figure 4E

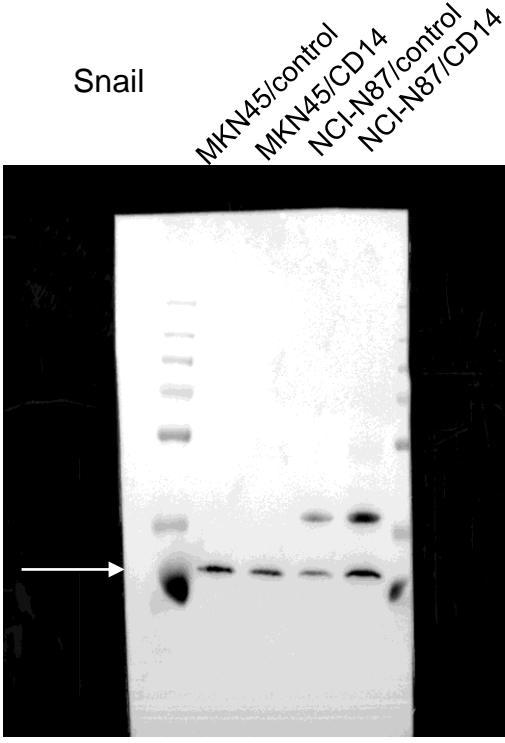

Figure 4E

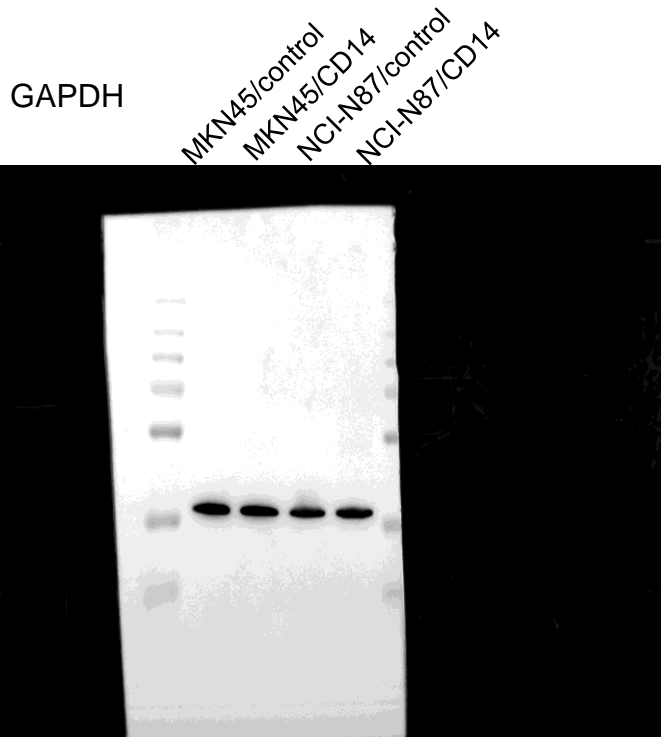

Figure 4E

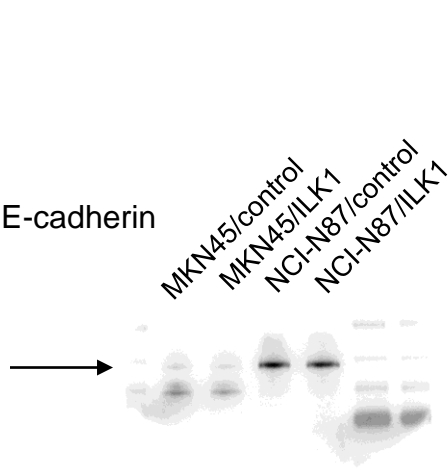

Figure 4E

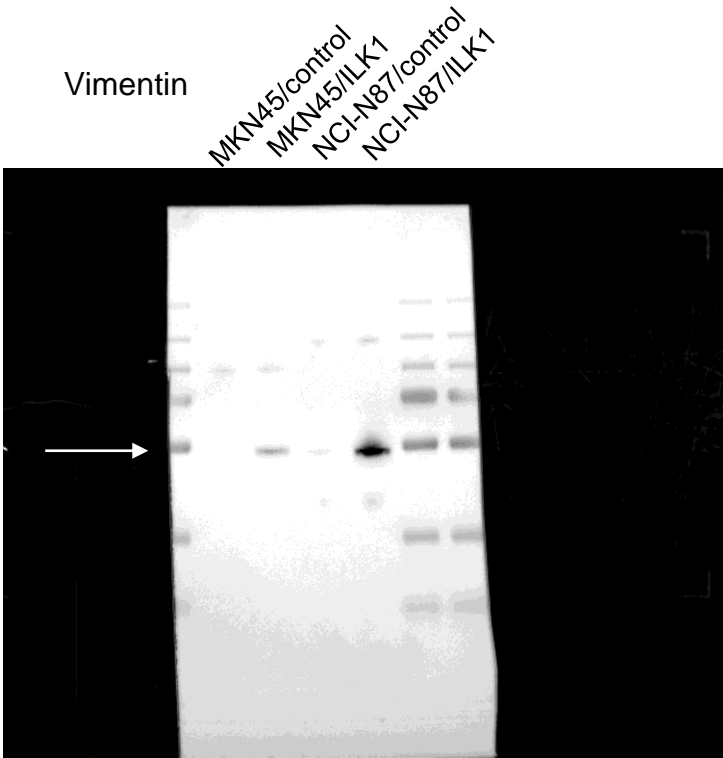

Figure 4E

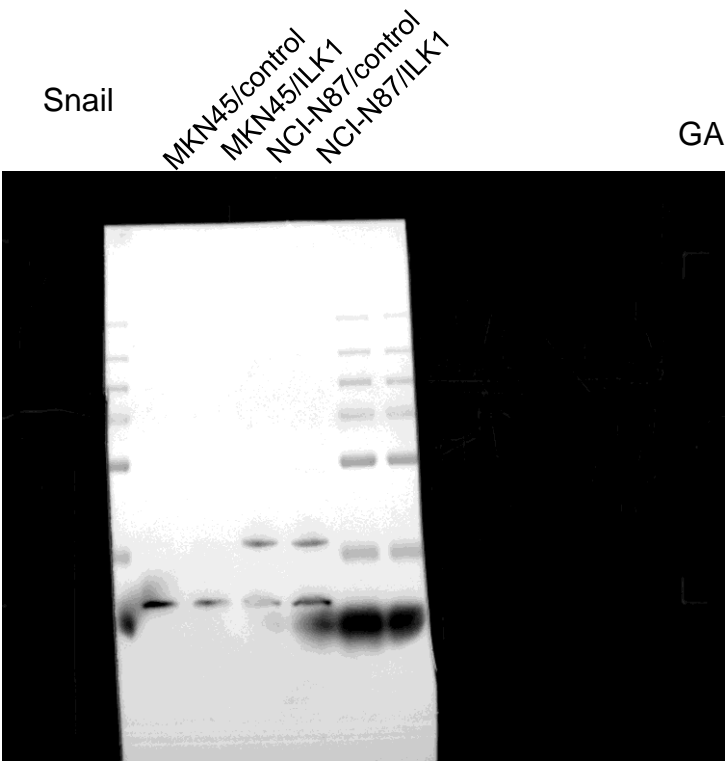

Figure 4E

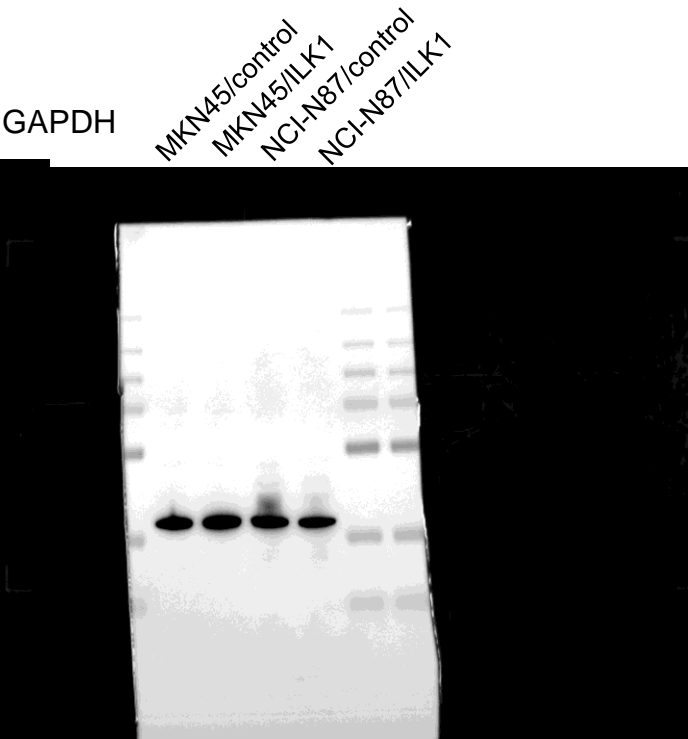

Figure 4E
