# Supplementary material for: Plasma Exosome Proteins ILK1 and CD14 Correlated with Organ-Specific Metastasis in Advanced Gastric Cancer Patients
Source: MDPI journal article supplement (doi:10.3390/cancers15153986), 2023-08-05
Supplement: s1 [file s1]

**Supplementary Table 1 Diameter and concentration of exosomes in samples**

| Sample | Diameter (nm) | Concentration (/ml)   |
|--------|---------------|-----------------------|
| H1_2   | 93            | $3.20 \times 10^{10}$ |
| P1_3   | 97.4          | $2.90 \times 10^{11}$ |
| L1_3   | 86.8          | $1.60 \times 10^{11}$ |
| L2_1   | 99.7          | $3.30 \times 10^{11}$ |
