# Supplementary figures and images for: Plasma Exosome Proteins ILK1 and CD14 Correlated with Organ-Specific Metastasis in Advanced Gastric Cancer Patients
Source: MDPI journal article supplement (doi:10.3390/cancers15153986), 2023-08-05

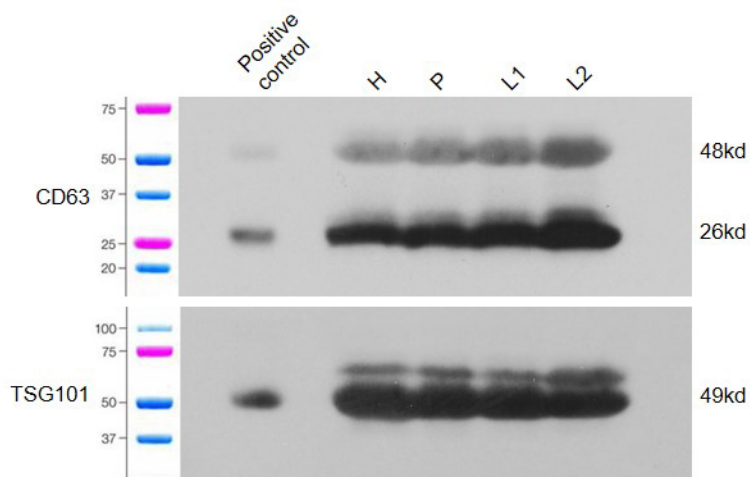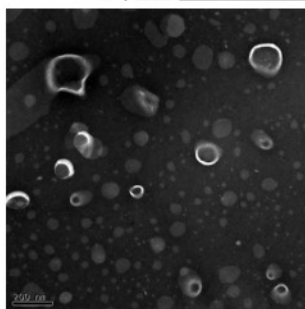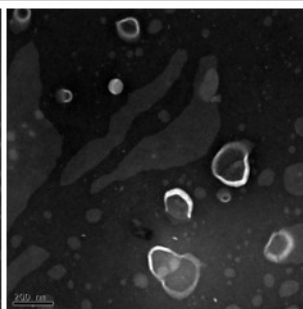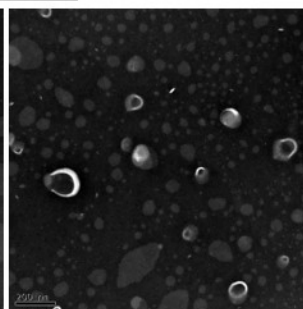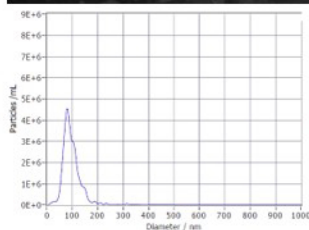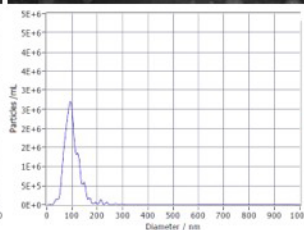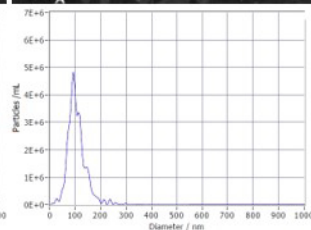

L

H

P

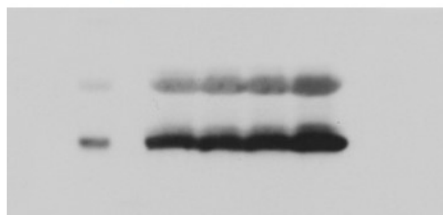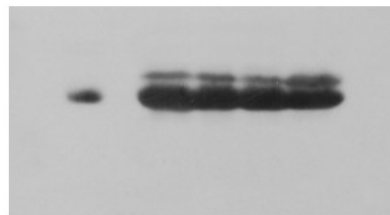

CD63

TSG101

Supplement: s1 [file s1]

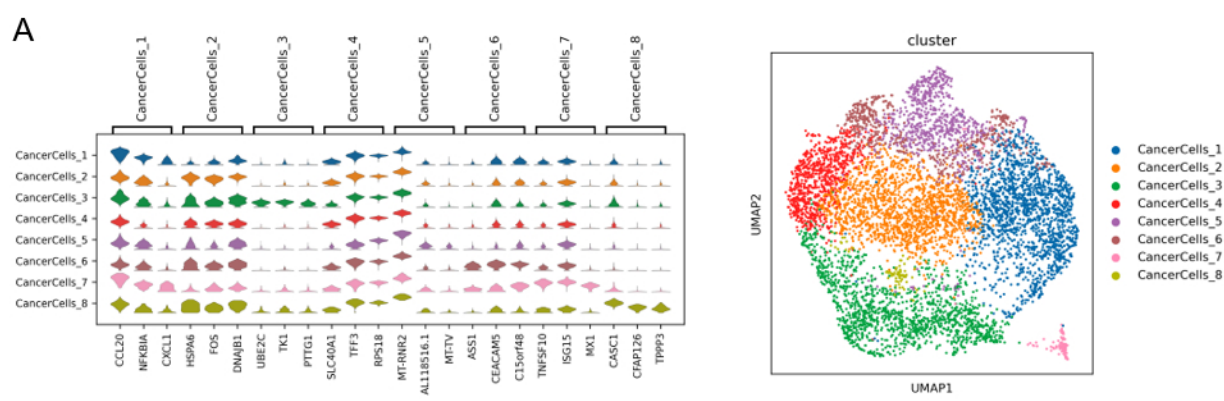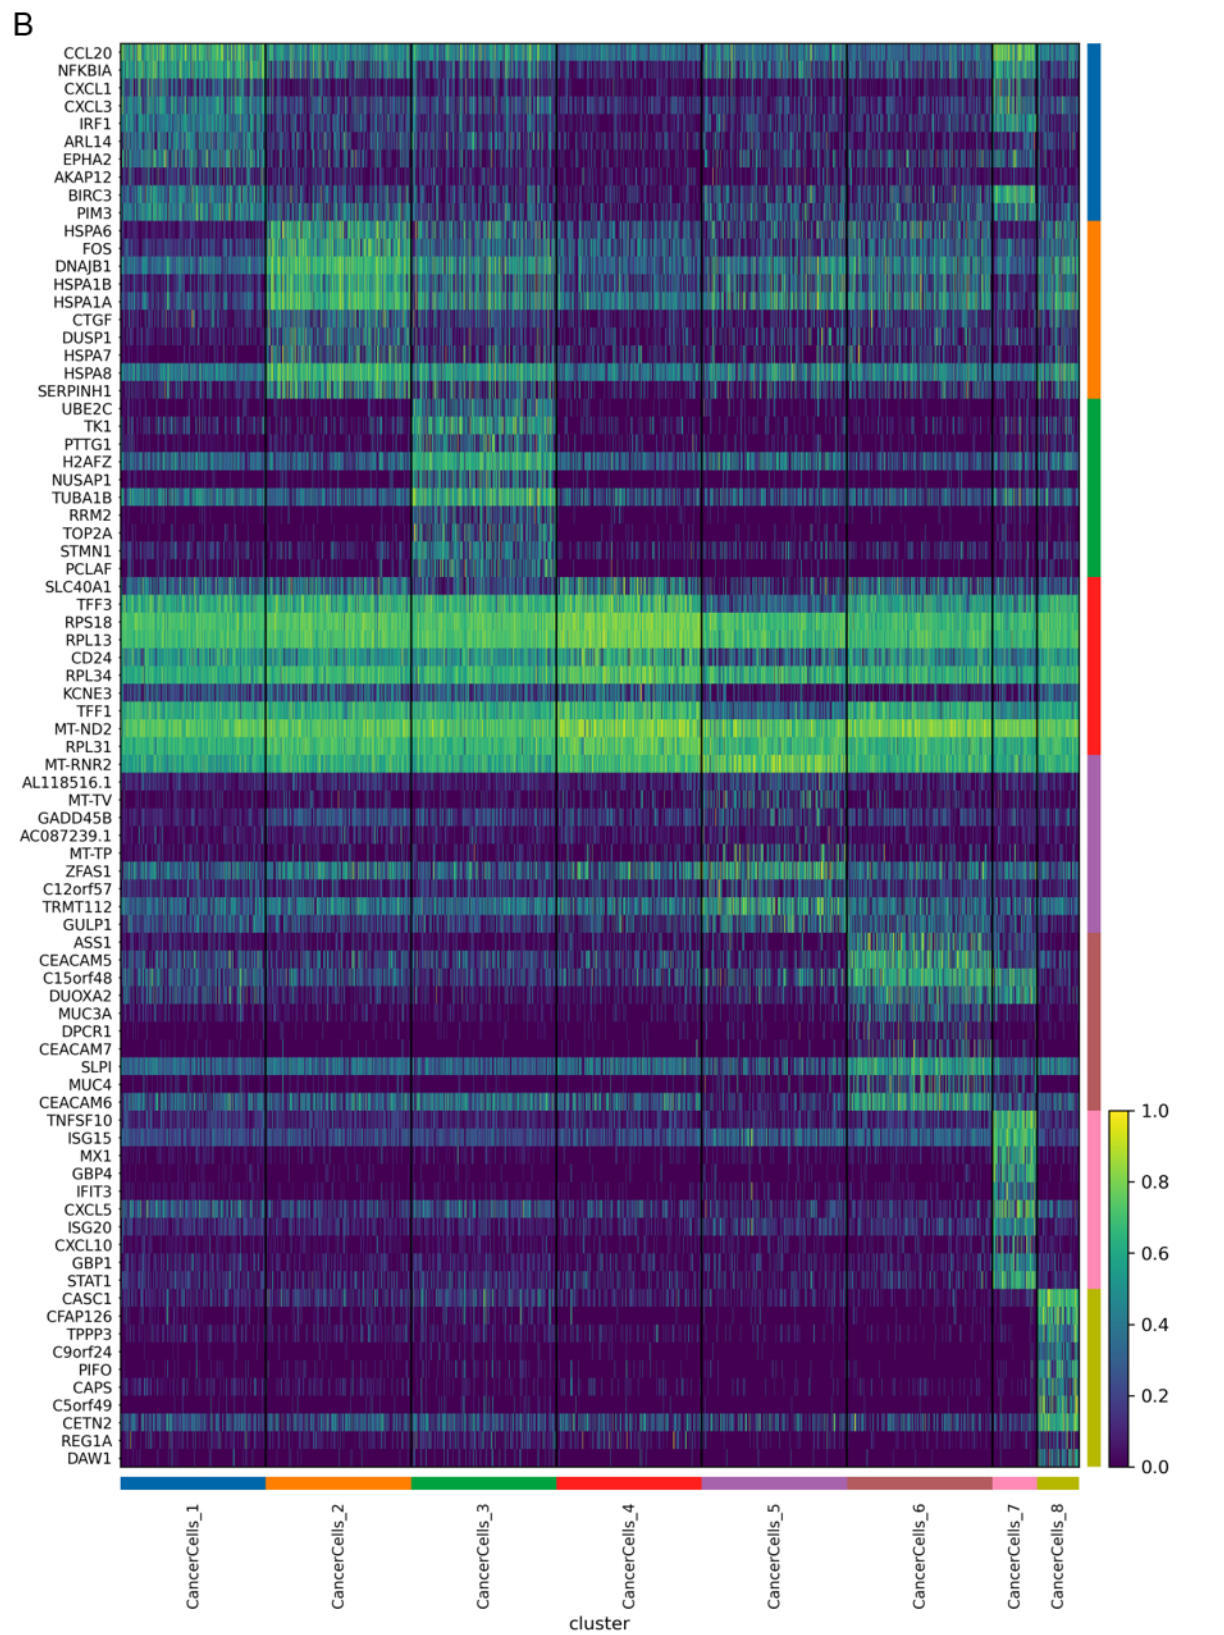

Supplement: s1 [file s1]

L-4

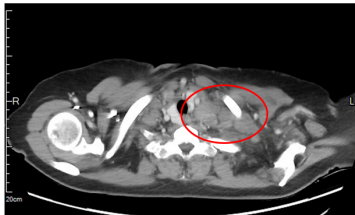

H-1

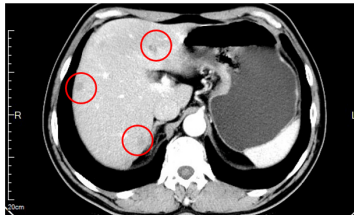

P-4

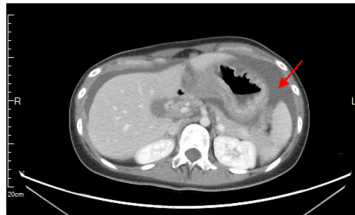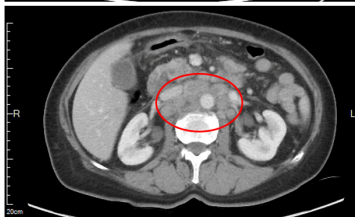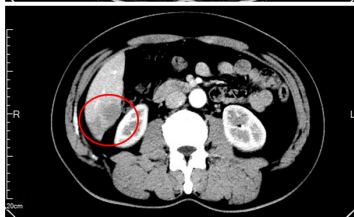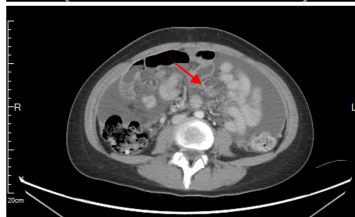

Supplement: s1 [file s1]
